# Supplementary material for: Antiplatelet drugs and breast cancer risk in a large nationwide Danish case‐control study
Source: PubMed Central journal article supplement — Int J Cancer. 2022 Nov 17;152(7):1337–47. doi: 10.1002/ijc.34343 (PMC10100032; doi:10.1002/ijc.34343), 2022-11-17
Supplement: IJC-152-1337-s001.pdf [file IJC-152-1337-s001.pdf]

**Additional file 1. Antiplatelet drugs and breast cancer risk in a large nationwide Danish case-control study.**

Manon Cairat, Anton Pottegård, Morten Olesen, Laure Dossus, Agnès Fournier, Blánaid Hicks

**Appendix S1** Danish Nationwide Registries (page 2).

**Appendix S2** Codes and definitions of outcome, exposure and exclusion criteria (page 3).

**Appendix S3** Codes and definitions of covariates (page 4).

**Table S1** Associations of antiplatelet drug use with risk of invasive breast cancer, stratified by estrogen receptor status (page 5).

**Table S2** Associations of antiplatelet drug use with risk of invasive breast cancer by histological type (page 6).

**Table S3** Associations of antiplatelet drug use with risk of invasive breast cancer by tumor stage (page 7).

**Table S4** Association between antiplatelet drug use and invasive breast cancer risk with exposure with no lag period, 1-year lag and 2-year lag (page 8).

**Table S5** Associations between antiplatelet drug use and invasive breast cancer risk restricted to women with a diagnosis of stroke or myocardial infarction (page 9).

**Table S6** Associations between antiplatelet drug use and breast cancer risk among women who are >55 years and never users of hormone replacement therapy (page 10).

**Table S7** Association between breast cancer risk and antiplatelet drugs taken alone or in combination with low-dose aspirin (page 11).

**Table S8** Associations between Vitamin K antagonists use and invasive breast cancer risk (page 11).

## **Appendix S1 – Danish Nationwide Registries**

The **Danish Cancer Registry** has recorded incident cases of cancer on a nationwide basis since 1943 and provides accurate and almost complete records of cancer cases in Denmark. Cancer diagnoses are coded according to the *International Classification of Diseases, Tenth Revision* 10 (ICD-10) and the ICD for Oncology (ICD-O-1-3) for topography and morphology.

The **Danish Pathology Register** contains records of pathological specimens, which for some departments dates back as early as 1970. Since 1990, all departments of pathology have used electronic registrations and from 1997, it became a legal obligation to report the pathologies to the Danish Pathology Register. The registry contains coded diagnoses based on the Danish Systematized Nomenclature of Medicine (SNOMED).

The **Danish National Prescription Registry** contains data on all prescription drugs filled by Danish residents since 1995. The data include the type of drug, date of filling, and quantity. The dosing information and the indication for prescribing are not available and no information is available on drugs used at hospital level. Drugs are categorized according to the Anatomic Therapeutic Chemical (ATC) index, a hierarchical classification system developed by the World Health Organization, and the quantity dispensed for each prescription is described by the number and strength of the pharmaceutical entities (e.g., tablets), as well as defined daily doses (DDD).

The **Danish National Patient Registry** contains nationwide data on all non-psychiatric hospital admissions since 1977 and on ambulatory hospital contacts and psychiatric admissions since 1995. Discharge/contact diagnoses have been coded according to ICD-8 from 1977 to 1993 and ICD-10 since 1994.

Statistics Denmark is a governmental institution that collects and processes information for a variety of statistical and scientific purposes, e.g. education and income. It hosts the **Population Education Registry**, which contains information on nearly all adult Danes and provides the highest completed level of education, defined as the longest duration of schooling.

The Danish **Civil Registration System** contains data on addresses, migration, and date of death. This system allowed us to extract population controls and to keep track of all subjects during the study period.

## Appendix S2– Codes and definitions of outcome, exposure and exclusion criteria

| <b>Breast cancer diagnosis, morphology and stage</b> |                        |                                                                                                                                                                                                                                                                                                                                                                                                        |
|------------------------------------------------------|------------------------|--------------------------------------------------------------------------------------------------------------------------------------------------------------------------------------------------------------------------------------------------------------------------------------------------------------------------------------------------------------------------------------------------------|
| Breast cancer cases                                  | <i>ICD-10</i>          | C50.0-C50.9                                                                                                                                                                                                                                                                                                                                                                                            |
| Histological subtype                                 |                        |                                                                                                                                                                                                                                                                                                                                                                                                        |
| Ductal adenocarcinoma                                | <i>Morphology code</i> | 85003, 85013, 85023, 85033, 85043, 85073, 85213, 85403, 85413                                                                                                                                                                                                                                                                                                                                          |
| Lobular adenocarcinoma                               | <i>Morphology code</i> | 85203, 85223                                                                                                                                                                                                                                                                                                                                                                                           |
| Other                                                | <i>Morphology code</i> | 81403, 82003, 82013, 82113, 82303, 82463, 82603, 83103, 83153, 84013, 84413, 84503, 84803, 84813, 84903, 85103, 85303, 85503, 85603, 85703, 85723, 85733, 85753, 80103, 80123, 80133, 80203, 80213, 80223, 80413, 80463, 80503, 80703, 80743, 80003, 80013, 87203, 88003, 88103, 88303, 88903, 89343, 89403, 89803, 89823, 90103, 90203, 91203, 91303, 95903, 95913, 96703, 96733, 96803, 96903, 97023 |
| Stage                                                |                        |                                                                                                                                                                                                                                                                                                                                                                                                        |
| Localized                                            | <i>TNM</i>             | (T=11-19 & N=30 & M=40) or (T=11-13 & [N=30 or N=39] & [M=40 or M=49]) or (T=14 & N=30 & M=49) or (T=14 & N=39 & M=40)                                                                                                                                                                                                                                                                                 |
| Non localized                                        | <i>TNM</i>             | (T=11-19 & N=31-33) or M=41                                                                                                                                                                                                                                                                                                                                                                            |
| Others                                               | <i>TNM</i>             | (T=19 & N=39 & M=49) or none of the above                                                                                                                                                                                                                                                                                                                                                              |
| ER status                                            |                        |                                                                                                                                                                                                                                                                                                                                                                                                        |
| ER+                                                  | <i>Pathology code</i>  | F29521, FYY501                                                                                                                                                                                                                                                                                                                                                                                         |
| ER-                                                  | <i>Pathology code</i>  | F29525, FYY505                                                                                                                                                                                                                                                                                                                                                                                         |
| <b>Exclusion criteria</b>                            |                        |                                                                                                                                                                                                                                                                                                                                                                                                        |
| Any cancer (except non-melanoma skin cancer)         | <i>ICD-10</i>          | C00-97 (except C44)                                                                                                                                                                                                                                                                                                                                                                                    |
| Mastectomy                                           | <i>NCSP-code</i>       | KHAC                                                                                                                                                                                                                                                                                                                                                                                                   |
| <b>Antiplatelet drugs</b>                            |                        |                                                                                                                                                                                                                                                                                                                                                                                                        |
| Clopidogrel                                          | <i>ATC code</i>        | B01AC04                                                                                                                                                                                                                                                                                                                                                                                                |
| Low-dose aspirin                                     | <i>ATC code</i>        | B01AC06, B01AC30, B01AC56, N02BA01 ( $\leq 100$ mg), and N02BA51 ( $\leq 150$ mg)                                                                                                                                                                                                                                                                                                                      |
| Dipyridamole                                         | <i>ATC code</i>        | B01AC07, B01AC30                                                                                                                                                                                                                                                                                                                                                                                       |

Abbreviations: ATC, Anatomical Therapeutic Chemical; ER, Estrogen Receptor; ICD, International Classification of Disease; NCSP, Nordic Classification of Surgical procedures; TNM, Tumor Node Metastasis staging system.

## Appendix S3– Codes and definitions of covariates

|                                                                        |           |                                                                                 |
|------------------------------------------------------------------------|-----------|---------------------------------------------------------------------------------|
| <b>Drugs</b>                                                           |           |                                                                                 |
| Antidiabetics                                                          | ATC code  | A10                                                                             |
| Statins                                                                | ATC code  | C10AA                                                                           |
| Spirolactone                                                           | ATC code  | C03DA01                                                                         |
| Loop diuretics                                                         | ATC code  | C03CA                                                                           |
| Beta-blockers                                                          | ATC code  | C07AA and C07AB                                                                 |
| Vascular calcium-channel blockers                                      | ATC code  | C08C                                                                            |
| Selective serotonin reuptake inhibitors                                | ATC code  | N06AB                                                                           |
| Raloxifen                                                              |           | G03XC01                                                                         |
| Hormone replacement therapy excluding vaginally administered estrogens | ATC code  | G03C, G03F, G03HB01 (excluding vaginally administered estrogens)                |
| Oral contraceptives                                                    | ATC code  | G03A                                                                            |
| <b>Prior diagnoses (diagnostic code or drug marker)</b>                |           |                                                                                 |
| Alcohol-related diseases (proxy of heavy alcohol consumption)          | ICD-8     | 291, 303, 425.5, 537.5, 571.0, 571.1, 571.2, 571.3, 577.10                      |
|                                                                        | ICD-10    | F10, E244, G312, G621, G721, I426, K292, K70, K852, K860, Q860, Z502 Z714, Z721 |
|                                                                        | ATC code  | N07BB                                                                           |
| Chronic obstructive pulmonary disease (proxy for heavy smoking)        | ICD-8     | 490, 491, 492                                                                   |
|                                                                        | ICD-10    | J41–J44                                                                         |
|                                                                        | ATC code  | R03BB                                                                           |
| Hypertension                                                           | ICD-8     | 400-404                                                                         |
|                                                                        | ICD-10    | I10-I15                                                                         |
|                                                                        | ATC code  | C03A, C07, C08, C09                                                             |
| Hypercholesterolemia                                                   | ICD-10    | E78.5                                                                           |
|                                                                        | ATC code  | C10                                                                             |
| Diabetes type 1 and 2                                                  | ICD-8     | 249, 250                                                                        |
|                                                                        | ICD-10    | E10–E14                                                                         |
|                                                                        | ATC codes | A10                                                                             |
| Acute myocardial infarction                                            | ICD-8     | 410                                                                             |
|                                                                        | ICD-10    | I21-I23                                                                         |
| Other ischemic heart disease                                           | ICD-8     | 411                                                                             |
|                                                                        | ICD-10    | I24                                                                             |
| Angina pectoris                                                        | ICD-8     | 413                                                                             |
|                                                                        | ICD-10    | I20                                                                             |
| Heart failure                                                          | ICD-8     | 42709, 42710, 42711, 42719, 42899, 78249                                        |
|                                                                        | ICD-10    | I110, I130, I132, I50                                                           |
| Stroke                                                                 | ICD-8     | 430-434                                                                         |
|                                                                        | ICD-10    | I61-I64                                                                         |
| Other cerebrovascular diseases                                         | ICD-8     | 435-438                                                                         |
|                                                                        | ICD-10    | I65-I69                                                                         |
| Atrial fibrillation or atrial flutter                                  | ICD-8     | 42793, 42794                                                                    |
|                                                                        | ICD-10    | I48                                                                             |
| Pulmonary embolism and infarction                                      | ICD-8     | 450                                                                             |
|                                                                        | ICD-10    | I26                                                                             |
| Phlebitis and thrombophlebitis                                         | ICD-8     | 451                                                                             |
|                                                                        | ICD-10    | I801-3, I809                                                                    |
| Portal vein thrombosis                                                 | ICD-8     | 452                                                                             |
|                                                                        | ICD-10    | I81                                                                             |
| Other venous embolism and thrombosis                                   | ICD-8     | 453                                                                             |
|                                                                        | ICD-10    | I82                                                                             |
| <b>Educational level</b>                                               |           |                                                                                 |
| Basic                                                                  | Duration  | 10 years                                                                        |
| Medium                                                                 | Duration  | 11–13 years                                                                     |
| Higher                                                                 | Duration  | >13 years                                                                       |
| Unknown                                                                | Duration  | -                                                                               |

Abbreviations: ATC, Anatomical Therapeutic Chemical; ICD, International Classification of Disease.

**Table S1. Associations of antiplatelet drug use with risk of invasive breast cancer by estrogen receptor status.**

|                         | ER+     |            |                          | ER-     |            |                          | <i>P</i> <sub>homogeneity</sub> |
|-------------------------|---------|------------|--------------------------|---------|------------|--------------------------|---------------------------------|
|                         | n cases | n controls | OR (95% CI) <sup>1</sup> | n cases | n controls | OR (95% CI) <sup>1</sup> |                                 |
| <b>Low-dose aspirin</b> |         |            |                          |         |            |                          |                                 |
| <b>Use categories</b>   |         |            |                          |         |            |                          |                                 |
| Never use               | 35,214  | 352,586    | 1.00 (ref.)              | 8,374   | 83,992     | 1.00 (ref.)              |                                 |
| Ever use                | 5,197   | 51,524     | 1.00 (0.96-1.03)         | 1,060   | 10,348     | 1.02 (0.93-1.10)         | 0.67                            |
| Long-term use           | 3,129   | 30,216     | 1.02 (0.97-1.07)         | 625     | 6,216      | 0.98 (0.88-1.09)         | 0.49                            |
| <b>Cumulative DDDs</b>  |         |            |                          |         |            |                          |                                 |
| Never use               | 35,214  | 352,586    | 1.00 (ref.)              | 8,374   | 83,992     | 1.00 (ref.)              |                                 |
| <500                    | 1,094   | 11,066     | 0.97 (0.91-1.04)         | 238     | 2,175      | 1.09 (0.94-1.25)         |                                 |
| ≥500 - <1000            | 974     | 10,242     | 0.94 (0.87-1.01)         | 197     | 1,957      | 1.00 (0.85-1.16)         |                                 |
| ≥1000 - <2000           | 1,428   | 13,846     | 1.02 (0.96-1.09)         | 260     | 2,674      | 0.96 (0.84-1.10)         |                                 |
| ≥2000 - <3000           | 894     | 8,585      | 1.04 (0.96-1.12)         | 180     | 1,705      | 1.04 (0.88-1.23)         |                                 |
| ≥3000                   | 807     | 7,785      | 1.04 (0.96-1.13)         | 185     | 1,837      | 0.99 (0.84-1.17)         |                                 |
| <i>OR per 1000 DDDs</i> | 5,197   | 51,524     | 1.01 (0.99-1.03)         | 1,060   | 10,348     | 0.99 (0.96-1.03)         |                                 |
| <b>Clopidogrel</b>      |         |            |                          |         |            |                          |                                 |
| <b>Use categories</b>   |         |            |                          |         |            |                          |                                 |
| Never use               | 39,870  | 397,924    | 1.00 (ref.)              | 9,302   | 92,888     | 1.00 (ref.)              |                                 |
| Ever use                | 541     | 6,186      | 0.88 (0.80-0.97)         | 132     | 1,452      | 0.90 (0.73-1.10)         | 0.87                            |
| Long-term use           | 112     | 1,381      | 0.81 (0.66-0.98)         | 37      | 376        | 0.98 (0.69-1.39)         | 0.38                            |
| <b>Cumulative DDDs</b>  |         |            |                          |         |            |                          |                                 |
| Never use               | 39,870  | 397,924    | 1.00 (ref.)              | 9,302   | 92,888     | 1.00 (ref.)              |                                 |
| <500                    | 304     | 3,557      | 0.87 (0.76-0.99)         | 61      | 757        | 0.78 (0.59-1.03)         |                                 |
| ≥500 - <1000            | 125     | 1,248      | 1.00 (0.83-1.21)         | 34      | 319        | 1.06 (0.74-1.53)         |                                 |
| ≥1000 - <2000           | 71      | 925        | 0.76 (0.60-0.97)         | 30      | 238        | 1.26 (0.85-1.86)         |                                 |
| ≥2000 - <3000           | 26      | 281        | 0.92 (0.62-1.38)         | 6       | 76         | 0.79 (0.34-1.83)         |                                 |
| ≥3000                   | 15      | 175        | 0.84 (0.49-1.42)         | (n<5)   | 62         | (-)                      |                                 |
| <i>OR per 1000 DDDs</i> | 541     | 6,186      | 0.92 (0.84-1.01)         | 132     | 1,452      | 0.90 (0.76-1.07)         |                                 |
| <b>Dipyridamole</b>     |         |            |                          |         |            |                          |                                 |
| <b>Use categories</b>   |         |            |                          |         |            |                          |                                 |
| Never use               | 39,800  | 397,640    | 1.00 (ref.)              | 9,294   | 93,050     | 1.00 (ref.)              |                                 |
| Ever use                | 611     | 6,470      | 0.94 (0.85-1.04)         | 140     | 1,290      | 1.17 (0.95-1.45)         | 0.08                            |
| Long-term use           | 305     | 3,181      | 0.95 (0.83-1.08)         | 69      | 661        | 1.14 (0.86-1.52)         | 0.27                            |
| <b>Cumulative DDDs</b>  |         |            |                          |         |            |                          |                                 |
| Never use               | 39,800  | 397,640    | 1.00 (ref.)              | 9,294   | 93,050     | 1.00 (ref.)              |                                 |
| <500                    | 195     | 2,068      | 0.93 (0.79-1.08)         | 51      | 411        | 1.33 (0.98-1.81)         |                                 |
| ≥500 - <1000            | 111     | 1,221      | 0.91 (0.74-1.11)         | 20      | 218        | 0.99 (0.62-1.60)         |                                 |
| ≥1000 - <2000           | 152     | 1,639      | 0.93 (0.78-1.11)         | 30      | 309        | 1.05 (0.71-1.56)         |                                 |
| ≥2000 - <3000           | 90      | 934        | 0.96 (0.77-1.20)         | 21      | 199        | 1.15 (0.72-1.83)         |                                 |
| ≥3000                   | 63      | 608        | 1.05 (0.80-1.36)         | 18      | 153        | 1.27 (0.76-2.10)         |                                 |
| <i>OR per 1000 DDDs</i> | 611     | 6,470      | 0.99 (0.94-1.05)         | 140     | 1,290      | 1.06 (0.96-1.17)         |                                 |

Abbreviations: CI, confidence interval; ER, estrogen receptor; DDD, defined daily dose; OR, Odds ratio.

<sup>1</sup> Adjusted for age, calendar time (by risk-set matching and the conditional analysis) and other covariates listed in the appendix S3.

**Table S2. Associations of antiplatelet drug use with risk of invasive breast cancer by histological type.**

|                         | Ductal adenocarcinoma |            |                          | Lobular adenocarcinoma |            |                          | Others  |            |                          | <i>P</i> <sub>homogeneity</sub> |
|-------------------------|-----------------------|------------|--------------------------|------------------------|------------|--------------------------|---------|------------|--------------------------|---------------------------------|
|                         | n cases               | n controls | OR (95% CI) <sup>1</sup> | n cases                | n controls | OR (95% CI) <sup>1</sup> | n cases | n controls | OR (95% CI) <sup>1</sup> |                                 |
| <b>Low-dose aspirin</b> |                       |            |                          |                        |            |                          |         |            |                          |                                 |
| <b>Use categories</b>   |                       |            |                          |                        |            |                          |         |            |                          |                                 |
| Never use               | 45,547                | 456,463    | 1.00 (ref.)              | 7,685                  | 76,004     | 1.00 (ref.)              | 7,036   | 70,896     | 1.00 (ref.)              |                                 |
| Ever use                | 6,076                 | 59,767     | 1.01 (0.97-1.04)         | 1,136                  | 12,206     | 0.94 (0.87-1.02)         | 1,336   | 12,824     | 0.99 (0.92-1.07)         | 0.31                            |
| Long-term use           | 3,624                 | 35,451     | 1.01 (0.96-1.05)         | 711                    | 7,363      | 1.00 (0.91-1.11)         | 851     | 8,053      | 1.01 (0.92-1.11)         | 0.99                            |
| <b>Cumulative DDDs</b>  |                       |            |                          |                        |            |                          |         |            |                          |                                 |
| Never use               | 45,547                | 456,463    | 1.00 (ref.)              | 7,685                  | 76,004     | 1.00 (ref.)              | 7,036   | 70,896     | 1.00 (ref.)              |                                 |
| <500                    | 1,345                 | 12,868     | 1.03 (0.97-1.09)         | 226                    | 2,530      | 0.88 (0.77-1.02)         | 251     | 2,497      | 0.98 (0.86-1.13)         |                                 |
| ≥500 - <1000            | 1,107                 | 11,448     | 0.95 (0.89-1.02)         | 199                    | 2,313      | 0.87 (0.75-1.02)         | 234     | 2,274      | 0.99 (0.86-1.14)         |                                 |
| ≥1000 - <2000           | 1,569                 | 15,555     | 1.00 (0.95-1.06)         | 290                    | 3,029      | 0.98 (0.86-1.12)         | 338     | 3,201      | 1.01 (0.89-1.14)         |                                 |
| ≥2000 - <3000           | 1,002                 | 9,768      | 1.02 (0.95-1.10)         | 202                    | 2,044      | 1.02 (0.87-1.19)         | 233     | 2,234      | 0.98 (0.85-1.14)         |                                 |
| ≥3000                   | 1,053                 | 10,128     | 1.04 (0.97-1.12)         | 219                    | 2,290      | 1.00 (0.86-1.17)         | 280     | 2,618      | 1.01 (0.87-1.16)         |                                 |
| OR per 1000 DDDs        | 6,076                 | 59,767     | 1.01 (0.99-1.02)         | 1,136                  | 12,206     | 1.00 (0.97-1.04)         | 1,336   | 12,824     | 1.00 (0.97-1.03)         |                                 |
| <b>Clopidogrel</b>      |                       |            |                          |                        |            |                          |         |            |                          |                                 |
| <b>Use categories</b>   |                       |            |                          |                        |            |                          |         |            |                          |                                 |
| Never use               | 50,870                | 507,989    | 1.00 (ref.)              | 8,669                  | 86,502     | 1.00 (ref.)              | 8,198   | 81,906     | 1.00 (ref.)              |                                 |
| Ever use                | 753                   | 8,241      | 0.93 (0.86-1.01)         | 152                    | 1,708      | 0.99 (0.82-1.20)         | 174     | 1,814      | 0.86 (0.72-1.03)         | 0.56                            |
| Long-term use           | 198                   | 2,039      | 0.98 (0.84-1.14)         | 39                     | 450        | 0.97 (0.69-1.36)         | 50      | 492        | 0.89 (0.66-1.22)         | 0.87                            |
| <b>Cumulative DDDs</b>  |                       |            |                          |                        |            |                          |         |            |                          |                                 |
| Never use               | 50,870                | 507,989    | 1.00 (ref.)              | 8,669                  | 86,502     | 1.00 (ref.)              | 8,198   | 81,906     | 1.00 (ref.)              |                                 |
| <500                    | 381                   | 4,478      | 0.87 (0.78-0.97)         | 76                     | 839        | 1.02 (0.79-1.32)         | 76      | 909        | 0.77 (0.59-0.99)         |                                 |
| ≥500 - <1000            | 174                   | 1,724      | 1.02 (0.87-1.20)         | 37                     | 419        | 0.98 (0.69-1.38)         | 48      | 413        | 1.02 (0.75-1.40)         |                                 |
| ≥1000 - <2000           | 136                   | 1,345      | 1.02 (0.85-1.23)         | 23                     | 288        | 0.88 (0.57-1.35)         | 37      | 314        | 1.05 (0.74-1.49)         |                                 |
| ≥2000 - <3000           | 41                    | 403        | 1.04 (0.75-1.44)         | 12                     | 98         | 1.36 (0.74-2.51)         | 7       | 98         | 0.61 (0.28-1.33)         |                                 |
| ≥3000                   | 21                    | 291        | 0.73 (0.47-1.14)         | (n<5)                  | 64         | (-)                      | 6       | 80         | 0.64 (0.28-1.48)         |                                 |
| OR per 1000 DDDs        | 753                   | 8,241      | 0.98 (0.91-1.05)         | 152                    | 1,708      | 1.00 (0.86-1.16)         | 174     | 1,814      | 0.92 (0.79-1.05)         |                                 |
| <b>Dipyridamole</b>     |                       |            |                          |                        |            |                          |         |            |                          |                                 |
| <b>Use categories</b>   |                       |            |                          |                        |            |                          |         |            |                          |                                 |
| Never use               | 50,913                | 509,099    | 1.00 (ref.)              | 8,699                  | 86,688     | 1.00 (ref.)              | 8,180   | 82,159     | 1.00 (ref.)              |                                 |
| Ever use                | 710                   | 7,131      | 1.03 (0.94-1.13)         | 122                    | 1,522      | 0.84 (0.68-1.04)         | 192     | 1,561      | 1.11 (0.93-1.34)         | 0.10                            |
| Long-term use           | 358                   | 3,617      | 1.02 (0.91-1.16)         | 66                     | 783        | 0.92 (0.69-1.21)         | 103     | 805        | 1.15 (0.90-1.45)         | 0.49                            |
| <b>Cumulative DDDs</b>  |                       |            |                          |                        |            |                          |         |            |                          |                                 |
| Never use               | 50,913                | 509,099    | 1.00 (ref.)              | 8,699                  | 86,688     | 1.00 (ref.)              | 8,180   | 82,159     | 1.00 (ref.)              |                                 |
| <500                    | 231                   | 2,250      | 1.04 (0.90-1.20)         | 29                     | 472        | 0.63 (0.43-0.93)         | 56      | 482        | 1.06 (0.79-1.42)         |                                 |
| ≥500 - <1000            | 121                   | 1,264      | 0.99 (0.82-1.21)         | 27                     | 267        | 1.07 (0.71-1.61)         | 33      | 274        | 1.10 (0.75-1.60)         |                                 |
| ≥1000 - <2000           | 165                   | 1,725      | 0.99 (0.84-1.18)         | 36                     | 372        | 1.03 (0.72-1.49)         | 49      | 358        | 1.24 (0.90-1.70)         |                                 |
| ≥2000 - <3000           | 107                   | 1,055      | 1.05 (0.86-1.29)         | 13                     | 219        | 0.61 (0.35-1.09)         | 25      | 257        | 0.86 (0.56-1.33)         |                                 |
| ≥3000                   | 86                    | 837        | 1.08 (0.86-1.36)         | 17                     | 192        | 0.95 (0.57-1.59)         | 29      | 190        | 1.40 (0.93-2.12)         |                                 |
| OR per 1000 DDDs        | 710                   | 7,131      | 1.02 (0.97-1.07)         | 122                    | 1,522      | 0.96 (0.86-1.07)         | 192     | 1,561      | 1.06 (0.98-1.16)         |                                 |

Abbreviations: CI, confidence interval; DDD, defined daily dose; OR, Odds ratio.

<sup>1</sup> Adjusted for age, calendar time (by risk-set matching and the conditional analysis) and other covariates listed in the appendix S3.

**Table S3. Associations of antiplatelet drug use with risk of invasive breast cancer by tumor stage.**

|                         | Localized |            |                          | Non localized |            |                          | Unknown |            |                          | <i>P</i> <sub>heterogeneity</sub> |
|-------------------------|-----------|------------|--------------------------|---------------|------------|--------------------------|---------|------------|--------------------------|-----------------------------------|
|                         | n cases   | n controls | OR (95% CI) <sup>1</sup> | n cases       | n controls | OR (95% CI) <sup>1</sup> | n cases | n controls | OR (95% CI) <sup>1</sup> |                                   |
| <b>Low-dose aspirin</b> |           |            |                          |               |            |                          |         |            |                          |                                   |
| <b>Use categories</b>   |           |            |                          |               |            |                          |         |            |                          |                                   |
| Never use               | 27,195    | 272,862    | 1.00 (ref.)              | 21,157        | 211,184    | 1.00 (ref.)              | 11,916  | 119,317    | 1.00 (ref.)              |                                   |
| Ever use                | 4,271     | 41,798     | 1.01 (0.97-1.05)         | 3,028         | 30,666     | 0.99 (0.95-1.04)         | 1,249   | 12,333     | 0.96 (0.89-1.04)         | 0.55                              |
| Long-term use           | 2,643     | 25,902     | 1.01 (0.96-1.06)         | 1,900         | 18,637     | 1.02 (0.96-1.09)         | 643     | 6,328      | 0.95 (0.86-1.06)         | 0.50                              |
| <b>Cumulative DDDs</b>  |           |            |                          |               |            |                          |         |            |                          |                                   |
| Never use               | 27,195    | 272,862    | 1.00 (ref.)              | 21,157        | 211,184    | 1.00 (ref.)              | 11,916  | 119,317    | 1.00 (ref.)              |                                   |
| <500                    | 917       | 8,448      | 1.06 (0.99-1.14)         | 592           | 6,310      | 0.94 (0.86-1.03)         | 313     | 3,137      | 0.95 (0.84-1.08)         |                                   |
| ≥500 - <1000            | 711       | 7,448      | 0.94 (0.86-1.02)         | 536           | 5,719      | 0.95 (0.86-1.04)         | 293     | 2,868      | 0.97 (0.86-1.11)         |                                   |
| ≥1000 - <2000           | 1,087     | 10,681     | 1.01 (0.94-1.08)         | 793           | 7,954      | 1.01 (0.93-1.09)         | 317     | 3,150      | 0.95 (0.84-1.08)         |                                   |
| ≥2000 - <3000           | 743       | 7,199      | 1.02 (0.94-1.11)         | 552           | 5,409      | 1.04 (0.94-1.14)         | 142     | 1,438      | 0.93 (0.78-1.12)         |                                   |
| ≥3000                   | 813       | 8,022      | 1.01 (0.93-1.10)         | 555           | 5,274      | 1.07 (0.97-1.18)         | 184     | 1,740      | 1.02 (0.86-1.21)         |                                   |
| OR per 1000 DDDs        | 4,271     | 41,798     | 1.00 (0.99-1.02)         | 3,028         | 30,666     | 1.02 (1.00-1.04)         | 1,249   | 12,333     | 0.99 (0.95-1.03)         |                                   |
| <b>Clopidogrel</b>      |           |            |                          |               |            |                          |         |            |                          |                                   |
| <b>Use categories</b>   |           |            |                          |               |            |                          |         |            |                          |                                   |
| Never use               | 30,874    | 308,219    | 1.00 (ref.)              | 23,823        | 237,674    | 1.00 (ref.)              | 13,040  | 130,504    | 1.00 (ref.)              |                                   |
| Ever use                | 592       | 6,441      | 0.92 (0.84-1.01)         | 362           | 4,176      | 0.94 (0.83-1.06)         | 125     | 1,146      | 1.01 (0.82-1.24)         | 0.74                              |
| Long-term use           | 164       | 1,623      | 1.02 (0.86-1.21)         | 90            | 1,039      | 0.90 (0.72-1.12)         | 33      | 319        | 0.94 (0.64-1.37)         | 0.64                              |
| <b>Cumulative DDDs</b>  |           |            |                          |               |            |                          |         |            |                          |                                   |
| Never use               | 30,874    | 308,219    | 1.00 (ref.)              | 23,823        | 237,674    | 1.00 (ref.)              | 13,040  | 130,504    | 1.00 (ref.)              |                                   |
| <500                    | 286       | 3,424      | 0.83 (0.73-0.95)         | 190           | 2,225      | 0.94 (0.80-1.11)         | 57      | 577        | 0.93 (0.70-1.25)         |                                   |
| ≥500 - <1000            | 142       | 1,394      | 1.02 (0.85-1.22)         | 82            | 912        | 0.96 (0.76-1.21)         | 35      | 250        | 1.26 (0.87-1.83)         |                                   |
| ≥1000 - <2000           | 104       | 1,046      | 1.00 (0.81-1.23)         | 71            | 698        | 1.07 (0.83-1.38)         | 21      | 203        | 0.95 (0.60-1.51)         |                                   |
| ≥2000 - <3000           | 39        | 340        | 1.17 (0.83-1.63)         | 13            | 193        | 0.70 (0.40-1.23)         | 8       | 66         | 1.07 (0.51-2.26)         |                                   |
| ≥3000                   | 21        | 237        | 0.90 (0.57-1.41)         | 6             | 148        | 0.43 (0.19-0.97)         | (n<5)   | 50         | (-)                      |                                   |
| OR per 1000 DDDs        | 592       | 6,441      | 1.01 (0.94-1.09)         | 362           | 4,176      | 0.91 (0.81-1.01)         | 125     | 1,146      | 0.98 (0.83-1.15)         |                                   |
| <b>Dipyridamole</b>     |           |            |                          |               |            |                          |         |            |                          |                                   |
| <b>Use categories</b>   |           |            |                          |               |            |                          |         |            |                          |                                   |
| Never use               | 31,000    | 309,665    | 1.00 (ref.)              | 23,808        | 237,968    | 1.00 (ref.)              | 12,984  | 130,313    | 1.00 (ref.)              |                                   |
| Ever use                | 466       | 4,995      | 0.94 (0.84-1.06)         | 377           | 3,882      | 1.03 (0.91-1.17)         | 181     | 1,337      | 1.25 (1.03-1.50)         | 0.06                              |
| Long-term use           | 265       | 2,712      | 0.99 (0.86-1.14)         | 199           | 2,006      | 1.07 (0.91-1.26)         | 63      | 487        | 1.20 (0.90-1.61)         | 0.49                              |
| <b>Cumulative DDDs</b>  |           |            |                          |               |            |                          |         |            |                          |                                   |
| Never use               | 31,000    | 309,665    | 1.00 (ref.)              | 23,808        | 237,968    | 1.00 (ref.)              | 12,984  | 130,313    | 1.00 (ref.)              |                                   |
| <500                    | 134       | 1,463      | 0.91 (0.76-1.09)         | 112           | 1,169      | 1.01 (0.82-1.24)         | 70      | 572        | 1.12 (0.86-1.46)         |                                   |
| ≥500 - <1000            | 67        | 820        | 0.83 (0.65-1.08)         | 66            | 707        | 0.99 (0.77-1.29)         | 48      | 278        | 1.62 (1.17-2.24)         |                                   |
| ≥1000 - <2000           | 122       | 1,257      | 0.99 (0.81-1.20)         | 96            | 978        | 1.04 (0.84-1.30)         | 32      | 220        | 1.32 (0.89-1.95)         |                                   |
| ≥2000 - <3000           | 72        | 773        | 0.95 (0.74-1.21)         | 56            | 622        | 0.96 (0.73-1.28)         | 17      | 136        | 1.16 (0.69-1.95)         |                                   |
| ≥3000                   | 71        | 682        | 1.08 (0.84-1.39)         | 47            | 406        | 1.25 (0.91-1.71)         | 14      | 131        | 0.99 (0.56-1.74)         |                                   |
| OR per 1000 DDDs        | 466       | 4,995      | 1.01 (0.95-1.06)         | 377           | 3,882      | 1.04 (0.98-1.11)         | 181     | 1,337      | 1.06 (0.95-1.18)         |                                   |

Abbreviations: OR, Odds ratio; CI, confidence interval; DDD, defined daily dose.

<sup>1</sup> Adjusted for age, calendar time (by risk-set matching and the conditional analysis) and other covariates listed in the appendix S3.

**Table S4. Association between antiplatelet drug use and invasive breast cancer risk with exposure with no lag period, 1-year lag and 2-year lag.**

|                         | Lag 0 year       |                          | Lag 1 year       |                          | Lag 2 years      |                          |
|-------------------------|------------------|--------------------------|------------------|--------------------------|------------------|--------------------------|
|                         | n cases/controls | OR (95% CI) <sup>1</sup> | n cases/controls | OR (95% CI) <sup>1</sup> | n cases/controls | OR (95% CI) <sup>1</sup> |
| <b>Low-dose aspirin</b> |                  |                          |                  |                          |                  |                          |
| Never use               | 59,406/594,376   | 1.00 (ref.)              | 60,268/603,363   | 1.00 (ref.)              | 61,183/612,231   | 1.00 (ref.)              |
| Ever use                | 9,410/93,784     | 0.99 (0.96-1.02)         | 8,548/84,797     | 1.00 (0.97-1.03)         | 7,633/75,929     | 0.99 (0.96-1.02)         |
| Long-term use           | 5,836/57,967     | 0.99 (0.96-1.03)         | 5,186/50,867     | 1.00 (0.97-1.04)         | 4,540/44,126     | 1.01 (0.98-1.05)         |
| <b>Clopidogrel</b>      |                  |                          |                  |                          |                  |                          |
| Never use               | 67,475/673,674   | 1.00 (ref.)              | 67,737/676,397   | 1.00 (ref.)              | 67,924/678,626   | 1.00 (ref.)              |
| Ever use                | 1,341/14,486     | 0.93 (0.88-1.00)         | 1,079/11,763     | 0.93 (0.87-1.00)         | 892/9,534        | 0.95 (0.88-1.03)         |
| Long-term use           | 397/4,080        | 0.97 (0.87-1.09)         | 287/2,981        | 0.96 (0.85-1.09)         | 207/2,112        | 0.94 (0.82-1.10)         |
| <b>Dipyridamole</b>     |                  |                          |                  |                          |                  |                          |
| Never use               | 67,673/676,686   | 1.00 (ref.)              | 67,792/677,946   | 1.00 (ref.)              | 67,908/679,140   | 1.00 (ref.)              |
| Ever use                | 1,143/11,474     | 1.00 (0.93-1.08)         | 1,024/10,214     | 1.02 (0.94-1.10)         | 908/9,020        | 1.02 (0.94-1.11)         |
| Long-term use           | 597/6,018        | 1.02 (0.93-1.12)         | 527/5,205        | 1.03 (0.93-1.14)         | 468/4,430        | 1.08 (0.97-1.20)         |

Abbreviations: OR, Odds ratio; CI, confidence interval

<sup>1</sup> Adjusted for age and calendar time (by risk-set matching and the conditional analysis) and other covariates listed in the appendix S3.



**Table S5. Associations between antiplatelet drug use and invasive breast cancer risk restricted to women with a diagnosis of stroke or myocardial infarction.**

|                         | n cases | n controls | OR (95% CI) <sup>1</sup> | OR (95% CI) <sup>2</sup> |
|-------------------------|---------|------------|--------------------------|--------------------------|
| <b>Low-dose aspirin</b> |         |            |                          |                          |
| <b>Use categories</b>   |         |            |                          |                          |
| Never use               | 715     | 7,004      | 1.00 (ref.)              | 1.00 (ref.)              |
| Ever use                | 1,768   | 18,727     | 0.98 (0.82-1.17)         | 0.98 (0.80-1.19)         |
| Long-term use           | 1,248   | 12,810     | 0.99 (0.80-1.21)         | 0.94 (0.75-1.19)         |
| <b>Cumulative DDDs</b>  |         |            |                          |                          |
| Never use               | 715     | 7,004      | 1.00 (ref.)              | 1.00 (ref.)              |
| <500                    | 250     | 2,759      | 1.03 (0.76-1.39)         | 1.04 (0.77-1.42)         |
| ≥500 - <1000            | 270     | 3,158      | 0.91 (0.69-1.20)         | 0.90 (0.67-1.20)         |
| ≥1000 - <2000           | 454     | 4,911      | 0.98 (0.78-1.24)         | 0.98 (0.76-1.25)         |
| ≥2000 - <3000           | 351     | 3,611      | 0.96 (0.74-1.24)         | 0.93 (0.71-1.23)         |
| ≥3000                   | 443     | 4,288      | 1.03 (0.82-1.29)         | 1.03 (0.80-1.32)         |
| <i>OR per 1000 DDDs</i> | 1,768   | 18,727     | 1.02 (0.97-1.07)         | 1.02 (0.97-1.08)         |
| <b>Clopidogrel</b>      |         |            |                          |                          |
| <b>Use categories</b>   |         |            |                          |                          |
| Never use               | 1,841   | 18,652     | 1.00 (ref.)              | 1.00 (ref.)              |
| Ever use                | 642     | 7,079      | 0.96 (0.80-1.16)         | 0.95 (0.78-1.15)         |
| Long-term use           | 172     | 1,843      | 0.83 (0.58-1.19)         | 0.79 (0.54-1.14)         |
| <b>Cumulative DDDs</b>  |         |            |                          |                          |
| Never use               | 1,841   | 18,652     | 1.00 (ref.)              | 1.00 (ref.)              |
| <500                    | 322     | 3,719      | 0.95 (0.75-1.19)         | 0.93 (0.73-1.19)         |
| ≥500 - <1000            | 148     | 1,517      | 0.91 (0.65-1.27)         | 0.88 (0.62-1.24)         |
| ≥1000 - <2000           | 119     | 1,162      | 1.03 (0.72-1.47)         | 1.03 (0.71-1.49)         |
| ≥2000 - <3000           | 34      | 387        | 1.12 (0.60-2.07)         | 1.02 (0.54-1.94)         |
| ≥ 3000                  | 19      | 294        | 1.12 (0.49-2.58)         | 1.21 (0.52-2.80)         |
| <i>OR per 1000 DDDs</i> | 642     | 7,079      | 1.04 (0.90-1.20)         | 1.04 (0.90-1.20)         |
| <b>Dipyridamole</b>     |         |            |                          |                          |
| <b>Use categories</b>   |         |            |                          |                          |
| Never use               | 1,798   | 18,806     | 1.00 (ref.)              | 1.00 (ref.)              |
| Ever use                | 685     | 6,925      | 1.05 (0.89-1.25)         | 1.04 (0.86-1.27)         |
| Long-term use           | 365     | 3,712      | 1.01 (0.80-1.28)         | 0.99 (0.77-1.29)         |
| <b>Cumulative DDDs</b>  |         |            |                          |                          |
| Never use               | 1,798   | 18,806     | 1.00 (ref.)              | 1.00 (ref.)              |
| <500                    | 194     | 1,992      | 1.01 (0.75-1.35)         | 1.03 (0.76-1.40)         |
| ≥500 - <1000            | 126     | 1,221      | 1.09 (0.76-1.57)         | 1.06 (0.73-1.54)         |
| ≥1000 - <2000           | 170     | 1,698      | 1.04 (0.77-1.42)         | 1.01 (0.73-1.40)         |
| ≥2000 - <3000           | 97      | 1,125      | 0.96 (0.66-1.40)         | 0.98 (0.66-1.46)         |
| ≥3000                   | 98      | 889        | 1.20 (0.83-1.73)         | 1.15 (0.78-1.67)         |
| <i>OR per 1000 DDDs</i> | 685     | 6,925      | 1.03 (0.95-1.12)         | 1.02 (0.94-1.11)         |

Abbreviations: CI, confidence interval; DDD, defined daily dose; OR, Odds ratio.

<sup>1</sup> Adjusted for age and calendar time (by risk-set matching and the conditional analysis).

<sup>2</sup> Adjusted for age and calendar time (by risk-set matching and the conditional analysis) and other covariates listed in the appendix S3.

**Table S6. Associations between antiplatelet drug use and breast cancer risk among women who are >55 years and never users of hormone replacement therapy.**

|                         | n cases | n controls | OR (95% CI) <sup>1</sup> | OR (95% CI) <sup>2</sup> |
|-------------------------|---------|------------|--------------------------|--------------------------|
| <b>Low-dose aspirin</b> |         |            |                          |                          |
| <b>Use categories</b>   |         |            |                          |                          |
| Never use               | 26,792  | 298,408    | 1.00 (ref.)              | 1.00 (ref.)              |
| Ever use                | 5,261   | 57,117     | 1.03 (1.00-1.07)         | 0.99 (0.95-1.03)         |
| Long-term use           | 3,274   | 34,891     | 1.05 (1.01-1.09)         | 1.00 (0.95-1.05)         |
| <b>Cumulative DDDs</b>  |         |            |                          |                          |
| Never use               | 26,792  | 298,408    | 1.00 (ref.)              | 1.00 (ref.)              |
| <500                    | 1,044   | 11,355     | 1.03 (0.96-1.10)         | 0.99 (0.93-1.06)         |
| ≥500 - <1000            | 943     | 10,871     | 0.98 (0.91-1.05)         | 0.94 (0.88-1.01)         |
| ≥1000 - <2000           | 1,387   | 14,914     | 1.03 (0.97-1.09)         | 0.99 (0.93-1.06)         |
| ≥2000 - <3000           | 926     | 9,708      | 1.08 (1.01-1.16)         | 1.04 (0.96-1.12)         |
| ≥3000                   | 961     | 10,269     | 1.04 (0.97-1.12)         | 1.01 (0.93-1.09)         |
| OR per 1000 DDDs        | 5,261   | 57,117     | 1.01 (1.00-1.03)         | 1.00 (0.99-1.02)         |
| <b>Clopidogrel</b>      |         |            |                          |                          |
| <b>Use categories</b>   |         |            |                          |                          |
| Never use               | 31,409  | 348,006    | 1.00 (ref.)              | 1.00 (ref.)              |
| Ever use                | 644     | 7,519      | 0.95 (0.87-1.03)         | 0.96 (0.87-1.05)         |
| Long-term use           | 170     | 1,877      | 1.00 (0.85-1.18)         | 0.99 (0.84-1.17)         |
| <b>Cumulative DDDs</b>  |         |            |                          |                          |
| Never use               | 31,409  | 348,006    | 1.00 (ref.)              | 1.00 (ref.)              |
| <500                    | 309     | 4,024      | 0.86 (0.76-0.96)         | 0.87 (0.77-0.99)         |
| ≥500 - <1000            | 165     | 1,618      | 1.11 (0.95-1.32)         | 1.10 (0.93-1.31)         |
| ≥1000 - <2000           | 117     | 1,268      | 1.04 (0.85-1.26)         | 1.02 (0.84-1.25)         |
| ≥2000 - <3000           | 38      | 343        | 1.21 (0.86-1.71)         | 1.20 (0.85-1.70)         |
| ≥ 3000                  | 15      | 266        | 0.61 (0.36-1.04)         | 0.60 (0.35-1.02)         |
| OR per 1000 DDDs        | 644     | 7,519      | 0.99 (0.92-1.06)         | 0.99 (0.92-1.07)         |
| <b>Dipyridamole</b>     |         |            |                          |                          |
| <b>Use categories</b>   |         |            |                          |                          |
| Never use               | 31,433  | 348,606    | 1.00 (ref.)              | 1.00 (ref.)              |
| Ever use                | 620     | 6,919      | 1.00 (0.92-1.09)         | 0.96 (0.87-1.06)         |
| Long-term use           | 317     | 3,529      | 1.00 (0.89-1.13)         | 0.97 (0.85-1.10)         |
| <b>Cumulative DDDs</b>  |         |            |                          |                          |
| Never use               | 31,433  | 348,606    | 1.00 (ref.)              | 1.00 (ref.)              |
| <500                    | 192     | 2,136      | 1.01 (0.87-1.18)         | 0.97 (0.82-1.13)         |
| ≥500 - <1000            | 111     | 1,254      | 0.98 (0.80-1.19)         | 0.94 (0.76-1.15)         |
| ≥1000 - <2000           | 156     | 1,688      | 1.05 (0.88-1.24)         | 1.01 (0.84-1.20)         |
| ≥2000 - <3000           | 85      | 1,021      | 0.92 (0.73-1.15)         | 0.88 (0.69-1.11)         |
| ≥3000                   | 76      | 820        | 1.04 (0.81-1.32)         | 1.01 (0.79-1.29)         |
| OR per 1000 DDDs        | 620     | 6,919      | 1.00 (0.96-1.05)         | 0.99 (0.94-1.04)         |

Abbreviations: CI, confidence interval; DDD, defined daily dose; OR, Odds ratio.dose

<sup>1</sup> Adjusted for age and calendar time (by risk-set matching and the conditional analysis).

<sup>2</sup> Adjusted for age and calendar time (by risk-set matching and the conditional analysis) and other covariates listed in the appendix S3.

**Table S7. Association between breast cancer risk and antiplatelet drugs taken alone or in combination with low-dose aspirin.**

| Use categories                                                                          | n cases | n controls | OR (95% CI) <sup>1</sup> | OR (95% CI) <sup>2</sup> |
|-----------------------------------------------------------------------------------------|---------|------------|--------------------------|--------------------------|
| <b>Use of low-dose aspirin but never concomitantly with clopidogrel or dipyridamole</b> |         |            |                          |                          |
| Never                                                                                   | 61,862  | 620,058    |                          |                          |
| Ever                                                                                    | 6,954   | 68,102     | 1.03 (1.00-1.05)         | 1.00 (0.97-1.03)         |
| Long-term                                                                               | 4,053   | 39,323     | 1.04 (1.00-1.07)         | 1.01 (0.98-1.05)         |
| <b>Use of clopidogrel but never concomitantly with low-dose aspirin</b>                 |         |            |                          |                          |
| Never                                                                                   | 68,358  | 683,226    |                          |                          |
| Ever                                                                                    | 458     | 4,934      | 0.93 (0.84-1.02)         | 0.93 (0.84-1.02)         |
| Long-term                                                                               | 182     | 1,783      | 1.01 (0.87-1.18)         | 1.01 (0.86-1.18)         |
| <b>Use of dipyridamole but never concomitantly with low-dose aspirin</b>                |         |            |                          |                          |
| Never                                                                                   | 68,736  | 687,504    |                          |                          |
| Ever                                                                                    | 80      | 656        | 1.22 (0.97-1.54)         | 1.20 (0.95-1.52)         |
| Long-term                                                                               | 17      | 157        | 1.09 (0.66-1.80)         | 1.10 (0.67-1.81)         |
| <b>Concomitant use of low-dose aspirin and clopidogrel</b>                              |         |            |                          |                          |
| Never                                                                                   | 68,063  | 680,004    |                          |                          |
| Ever                                                                                    | 753     | 8,156      | 0.92 (0.85-0.99)         | 0.96 (0.88-1.04)         |
| Long-term                                                                               | 618     | 6,482      | 0.95 (0.88-1.03)         | 0.99 (0.90-1.09)         |
| <b>Concomitant use of low-dose aspirin and dipyridamole</b>                             |         |            |                          |                          |
| Never                                                                                   | 67,751  | 677,164    |                          |                          |
| Ever                                                                                    | 1,065   | 10,996     | 0.97 (0.91-1.03)         | 0.97 (0.90-1.04)         |
| Long-term                                                                               | 836     | 8,363      | 1.00 (0.93-1.07)         | 1.00 (0.92-1.09)         |

Abbreviations: OR, Odds ratio; CI, confidence interval; DDD, defined daily dose

<sup>1</sup> Adjusted for age and calendar time (by risk-set matching and the conditional analysis).

<sup>2</sup> Adjusted for age and calendar time (by risk-set matching and the conditional analysis) and other covariates listed in the appendix S3.

**Table S8. Associations between Vitamin K antagonists use and invasive breast cancer risk.**

| Use categories          | n cases | n controls | OR (95% CI) <sup>1</sup> | OR (95% CI) <sup>2</sup> |
|-------------------------|---------|------------|--------------------------|--------------------------|
| Never use               | 66,987  | 672,591    | 1.00 (ref.)              | 1.00 (ref.)              |
| Ever use                | 1,829   | 15,569     | 1.18 (1.13-1.25)         | 1.07 (1.00-1.14)         |
| Long-term use           | 456     | 3,621      | 1.26 (1.14-1.39)         | 1.14 (1.02-1.28)         |
| <b>Cumulative DDDs</b>  |         |            |                          |                          |
| Never use               | 66,987  | 672,591    | 1.00 (ref.)              | 1.00 (ref.)              |
| <500                    | 1,000   | 9,294      | 1.08 (1.02-1.16)         | 0.99 (0.91-1.06)         |
| ≥500 - <1000            | 373     | 2,654      | 1.42 (1.27-1.58)         | 1.26 (1.12-1.42)         |
| ≥1000 - <2000           | 275     | 2,249      | 1.24 (1.09-1.40)         | 1.10 (0.96-1.25)         |
| ≥2000 - <3000           | 106     | 806        | 1.33 (1.09-1.63)         | 1.18 (0.96-1.46)         |
| ≥3000                   | 75      | 566        | 1.34 (1.05-1.70)         | 1.21 (0.95-1.55)         |
| <i>OR per 1000 DDDs</i> | 1,829   | 15,569     | 1.14 (1.10-1.19)         | 1.08 (1.03-1.13)         |

Abbreviations: CI, confidence interval; DDD, defined daily dose; OR, Odds ratio.

<sup>1</sup> Adjusted for age and calendar time (by risk-set matching and the conditional analysis).

<sup>2</sup> Adjusted for age and calendar time (by risk-set matching and the conditional analysis) and other covariates listed in the appendix S3.
